# Supplementary material for: 2,6-Substituted pyridine derivative-containing conjugated polymers: synthesis, photoluminescence and ion-sensing properties
Source: Royal Society of Chemistry journal article supplement (doi:10.1039/c1py00149c), 2011-01-01
Supplement: c1py00149c.pdf [file c1py00149c.pdf]

## Electronic Supplementary Information

for

2, 6-substituted pyridine derivative-containing conjugated  
polymers: Synthesis, photoluminescence and ion-sensing  
properties

Bin Liu, Huiguang Dai, Yinyin Bao, Fanfan Du, Jiao Tian and Ruke Bai\*

*CAS Key Laboratory of Soft Matter Chemistry, Department of Polymer Science and Engineering, University of Science and Technology of China, Hefei, P. R. China 230026.*

*E-mail: [bairk@ustc.edu.cn](mailto:bairk@ustc.edu.cn)*

*Tel: 0086-551-3600722; Fax: 0086-551-3631760*

### Contents

- 1. The characterization data of monomer 9 and polymer P-2**
- 2. UV-Vis absorption and emission spectra of P-1 and P-2**

## 1. The characterization data of monomer **9** and polymer **P-2**

$^1\text{H}$  NMR spectra of **9**

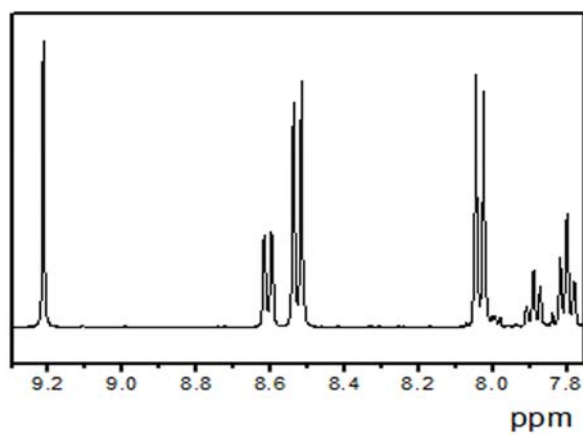

$^{13}\text{C}$  NMR spectra of **9**

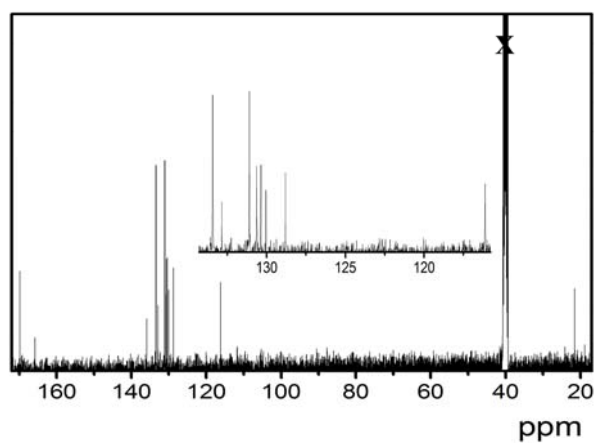

$^1\text{H}$  NMR spectra of **P-2**

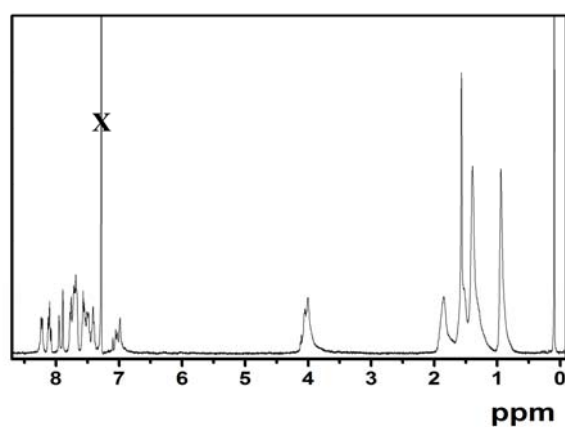

## 2. UV-Vis absorption and emission spectra of polymer P-1 and P-2.

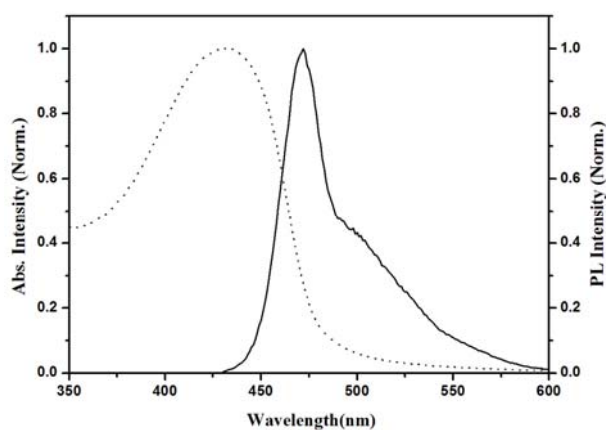

**Fig. S1.** Normalized UV-Vis absorption and emission spectra of polymer **P-1** in THF. The dash line is absorption spectra and the solid line is emission spectra, respectively.

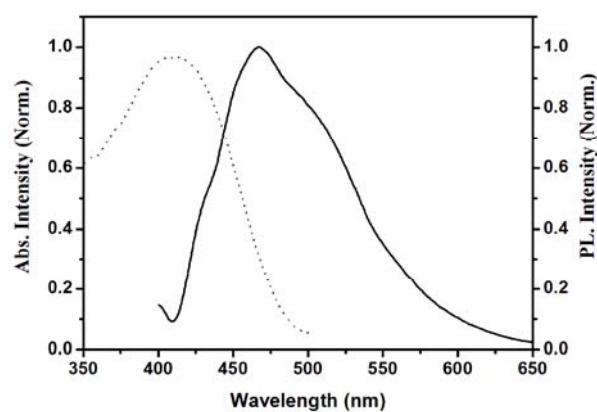

**Fig. S2.** Normalized UV-Vis absorption and emission spectra of polymer **P-2** in THF. The dash line is absorption spectra and the solid line is emission spectra, respectively.
